# Supplementary material for: Genome-wide association identifies novel ROP risk loci in a multiethnic cohort
Source: PubMed Central journal article supplement (PMC10794688; doi:10.1038/s42003-023-05743-9), 2024-01-17
Supplement: 42003_2023_5743_MOESM2_ESM.pdf [file 42003_2023_5743_MOESM2_ESM.pdf]

*Supplementary Data*

| Gene Name           | SNP        | Relationship | Reference            | Study Design | Race/Ethnicity            | N                                                | Outcome Measure            | Analysis Design              | Significance                                            | BW and GA adjustment         |
|---------------------|------------|--------------|----------------------|--------------|---------------------------|--------------------------------------------------|----------------------------|------------------------------|---------------------------------------------------------|------------------------------|
| <i>BDNF</i>         | rs7934165  | risk         | Hartnett et al; 2014 | Case control | 71.4% self-reported black | Control: 264<br>Mild ROP: 467<br>Severe ROP: 126 | Severe ROP                 | Candidate SNP Chip-based     | $P = 2.9 \times 10^{-7}$ in meta-analysis               | Yes                          |
| <i>BDNF</i>         | rs2049046  | risk         | Hartnett et al; 2014 | Case control | 71.4% self-reported black | Control: 264<br>Mild ROP: 467<br>Severe ROP: 126 | Severe ROP                 | Candidate SNP Chip-based     | $P = 3 \times 10^{-5}$                                  | Yes                          |
| <i>THSD4</i>        |            | risk         | Kim SJ et al; 2021   | Case control | Non-Hispanic Caucasian    | 58 Severe ROP<br>42 Mild ROP                     | Severe ROP                 | Whole exome sequencing       | $P = 5.04 \times 10^{-4}$                               | Yes                          |
| <i>BDNF</i>         | rs7929344  | protection   | Ilguy S et al; 2021  | Case control | Persian                   | 75 mild-moderate ROP<br>73 severe ROP            | Severe ROP                 | Candidate SnapShot technique | $p < .001$                                              | No                           |
| <i>VEGFA</i>        | rs2010963  | risk         | Ilguy S et al; 2021  | Case control | Persian                   | 75 mild-moderate ROP<br>73 severe ROP            | Severe ROP                 | Candidate SnapShot technique | $p < .001$                                              | No                           |
| <i>VEGFA</i>        | rs3025039  | risk         | Ilguy S et al; 2021  | Case control | Persian                   | 75 mild-moderate ROP<br>73 severe ROP            | Severe ROP                 | Candidate SnapShot technique | $p < .001$                                              | No                           |
| <i>EPAS1</i>        | rs13419896 | risk         | Ilguy S et al; 2021  | Case control | Persian                   | 75 mild-moderate ROP<br>73 severe ROP            | Severe ROP                 | Candidate SnapShot technique | $p = .022$                                              | No                           |
| <i>NOS3</i>         | rs2070744  | risk         | Ilguy S et al; 2021  | Case control | Persian                   | 75 mild-moderate ROP<br>73 severe ROP            | Severe ROP                 | Candidate SnapShot technique | $p = .004$                                              | No                           |
| <i>VEGF</i>         | 460 T/C    | risk         | Luo Y et al; 2019    | N/A          | N/A                       | 14 studies                                       | Presence or absence of ROP | Meta-analysis                | C vs. T, OR = 0.83, 95% CI: 0.74–0.94, $P_{OR} = 0.004$ | N/A                          |
| <i>TNF - 308G/A</i> | 308G/A     | Risk         | Lei XJ et al; 2018   | Case control | Chinese                   | 724 advanced ROP                                 | Presence or absence of ROP | Candidate PCR-RFLP method    | GA genotype, aOR: 1.956, 95%CI: 1.396-2.465,            | Yes reflected in adjusted OR |

|        |          |            |                    |              |         |                               |                            |                                                      |                                                                                                                                          |                              |
|--------|----------|------------|--------------------|--------------|---------|-------------------------------|----------------------------|------------------------------------------------------|------------------------------------------------------------------------------------------------------------------------------------------|------------------------------|
|        |          |            |                    |              |         | 878 controls                  |                            | with sequencing validation                           | $P < 0.001$ ; AA genotype, aOR: 2.809, 95%CI: 1.802-4.484, $P < 0.001$                                                                   |                              |
| ACE ID | D allele | protection | Lei XJ et al; 2018 | Case control | Chinese | 724 advanced ROP 878 controls | Presence or absence of ROP | Candidate PCR-RFLP method with sequencing validation | ID genotype, adjusted OR (aOR): 0.603, 95%CI: 0.427-0.893, $P = 0.034$ ;<br><br>DD genotype, aOR: 0.468, 95%CI: 0.229-0.626, $P = 0.002$ | Yes reflected in adjusted OR |

**Supplementary Table 1: Prior Evidence of Genetic ROP Risk**

| Race/Ethnicity    | No ROP  | Stage 1 | Stage 2 | Stage 3 | Stage 4 | Stage 5 | Total       |
|-------------------|---------|---------|---------|---------|---------|---------|-------------|
| European Ancestry | 370     | 174     | 198     | 179     | 35      | 11      | 967 (44.2%) |
| African American  | 123     | 33      | 44      | 47      | 3       | 1       | 251 (11.5%) |
| Hispanic          | 246     | 135     | 235     | 149     | 49      | 43      | 857 (39.2%) |
| Other             | 46      | 14      | 26      | 20      | 1       | 5       | 112 (5%)    |
| <b>Total</b>      | 785     | 356     | 503     | 395     | 88      | 60      | 2187        |
| <b>%</b>          | (35.9%) | (16.3%) | (23%)   | (18.1%) | (4%)    | (2.7%)  |             |

**Supplementary Table 2: Full iROP cohort ethnicity and ROP diagnosis**

| SNP        | chr:position | Ethnicity | Effect allele | AF: Case | AF: Control | OR   | p-value  | p-value adj. BW & GA | gene          |
|------------|--------------|-----------|---------------|----------|-------------|------|----------|----------------------|---------------|
| rs17048572 | 4:137201813  | HA        | C             | 0.02     | 0.02        | Na   | Na       | na                   | none          |
|            |              | EA        | C             | 0.14     | 0.04        | 1.39 | 4.19E-5  | 1.99E-8*             |               |
|            |              | AA        | C             | 0.04     | 0.06        | 0.88 | 0.40     | 0.15                 |               |
|            |              | All       | C             | 0.06     | 0.04        | Na   | Na       | na                   |               |
| rs9978278  | 21:37894721  | HA        | T             | 0.06     | 0.09        | 0.96 | 0.88     | 0.48                 | <i>CLDN14</i> |
|            |              | EA        | T             | 0.12     | 0.24        | 0.94 | 5.8E-03  | 0.08                 |               |
|            |              | AA        | T             | 0.25     | 0.03        | 1.71 | 4.04E-9* | 1.63E-8*             |               |
|            |              | All       | T             | 0.09     | 0.13        | 0.97 | 0.16     | 0.24                 |               |
| rs74048122 | 14:43889545  | HA        | G             | 0.03     | 0.06        | Na   | Na       | na                   | None          |
|            |              | EA        | G             | 0.08     | 0.07        | 0.99 | 0.55     | 0.86                 |               |
|            |              | AA        | G             | 0.32     | 0.04        | 1.53 | 2.62E-8* | 3.14E-8*             |               |
|            |              | All       | G             | 0.07     | 0.06        | 1.03 | 0.25     | 0.43                 |               |
| rs1004464  | 9:131003677  | HA        | G             | 0.06     | 0.13        | 0.93 | 0.17     | 0.14                 | <i>DNMI</i>   |
|            |              | EA        | G             | 0.13     | 0.18        | 0.95 | 0.40     | 0.20                 |               |
|            |              | AA        | G             | 0.61     | 0.19        | 1.29 | 1.74E-7  | 2.62E-8*             |               |
|            |              | All       | G             | 0.14     | 0.17        | 0.99 | 0.86     | 0.82                 |               |

**Supplementary Table 3: Racial and Ethnic differences in GWAS-identified SNP associations with severe ROP disease**

**Supplementary Table 4: Top regional *GLI3* SNPs by Ethnicity and Race**

| SNP              |          |                 | Ethnicity/<br>Race | Effect Allele | AF    | AF: Case | AF: Control | OR   | p-value (with BW & GA adjustment) | p-value (no BW & GA adjustment) | gene        |
|------------------|----------|-----------------|--------------------|---------------|-------|----------|-------------|------|-----------------------------------|---------------------------------|-------------|
| SNP<br>rs2058019 | Chr<br>7 | pos<br>42226712 | EA                 | T             | 0.012 | 0.037    | 0.006       | 1.61 | 4.00E-04                          | 4.40E-03                        | <i>GLI3</i> |
|                  |          |                 | HA                 | T             | 0.113 | 0.218    | 0.078       | 1.26 | 2.95E-06                          | 1.10E-05                        |             |
|                  |          |                 | AA                 | T             | 0.014 | 0        | 0.015       | 0.87 | 0.49                              | 0.37                            |             |
| rs3779167        | 7        | 42217416        | All                | T             | 0.06  | 0.135    | 0.039       | 1.27 | 4.96E-09*                         | 5.25E-08                        |             |
|                  |          |                 | EA                 | A             | 0.011 | 0.037    | 0.004       | 1.76 | 1.00E-04                          | 1.10E-03                        | <i>GLI3</i> |
|                  |          |                 | HA                 | A             | 0.113 | 0.214    | 0.08        | 1.25 | 5.22E-06                          | 2.33E-05                        |             |

|            |   |          |     |   |       |       |       |      |           |          |      |
|------------|---|----------|-----|---|-------|-------|-------|------|-----------|----------|------|
|            |   |          | AA  | A | 0.018 | 0     | 0.021 | 0.87 | 0.41      | 0.26     |      |
| rs77379983 |   |          | All | A | 0.06  | 0.129 | 0.04  | 1.26 | 2.05E-08* | 3.16E-07 |      |
|            | 7 | 42221815 | EA  | A | 0.012 | 0.037 | 0.006 | 1.61 | 4.00E-04  | 4.40E-03 | GLI3 |
|            |   |          | HA  | A | 0.113 | 0.214 | 0.08  | 1.25 | 6.31E-06  | 2.55E-05 |      |
|            |   |          | AA  | A | 0.014 | 0     | 0.015 | 0.87 | 0.49      | 0.37     |      |
| rs2058020  |   |          | All | A | 0.06  | 0.129 | 0.04  | 1.26 | 2.96E-08* | 4.20E-07 |      |
|            | 7 | 42226656 | EA  | A | 0.015 | 0.044 | 0.008 | 1.52 | 5.20E-04  | 3.50E-03 | GLI3 |
|            |   |          | HA  | A | 0.113 | 0.223 | 0.086 | 1.24 | 8.37E-06  | 3.16E-05 |      |
|            |   |          | AA  | A | 0.036 | 0.036 | 0.036 | 1    | 0.99      | 0.91     |      |
| rs76257295 |   |          | All | A | 0.07  | 0.142 | 0.048 | 1.23 | 4.66E-08* | 2.51E-07 |      |
|            | 7 | 42237521 | EA  | T | 0.014 | 0.037 | 0.008 | 1.59 | 3.68E-04  | 8.70E-03 | GLI3 |
|            |   |          | HA  | T | 0.113 | 0.218 | 0.085 | 1.24 | 8.94E-06  | 5.70E-05 |      |
|            |   |          | AA  | T | 0.014 | 0     | 0.015 | 0.87 | 0.49      | 0.37     |      |
|            |   |          | All | T | 0.06  | 0.135 | 0.044 | 1.24 | 5.57E-08* | 8.62E-07 |      |

top SNPs for HA only

rs188038522

|   |          |    |   |       |       |       |      |          |          |    |      |
|---|----------|----|---|-------|-------|-------|------|----------|----------|----|------|
| 7 | 42209806 | EA | C | 0.008 | na    | na    | na   | na       | na       | na | GLI3 |
|   |          | HA | C | 0.123 | 0.228 | 0.088 | 1.37 | 2.27E-06 | 1.20E-05 |    |      |
|   |          | AA | C | 0.018 | 0     | 0.021 | 0.87 | 0.41     | 0.26     |    |      |

rs3801212

|   |          |     |   |       |       |       |      |          |          |      |
|---|----------|-----|---|-------|-------|-------|------|----------|----------|------|
| 7 | 42207032 | EA  | G | 0.011 | 0.022 | 0.008 | 1.38 | 0.022    | 0.097    | GLI3 |
|   |          | HA  | G | 0.182 | 0.291 | 0.145 | 1.2  | 4.40E-06 | 2.01E-05 |      |
|   |          | AA  | G | 0.34  | 0.036 | 0.034 | 1.02 | 0.64     | 0.76     |      |
|   |          | All | G | 0.13  | 0.193 | 0.116 | 1.14 | 8.30E-06 | 3.63E-05 |      |

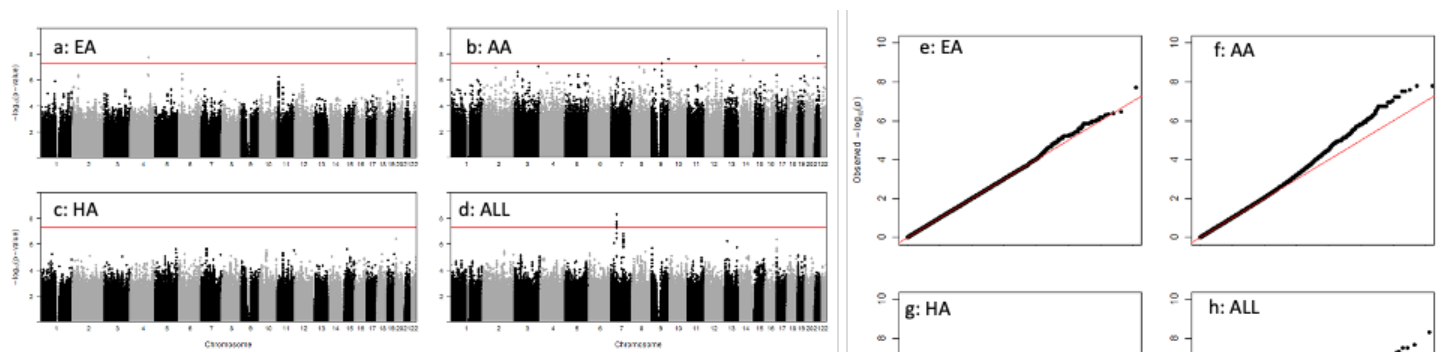

**Supplementary Figure 1: *GLI3* variation is associated with ROP severity in a multiethnic cohort.**

Manhattan plot (a-d) and QQ plot (e-h) of genome-wide association with ROP Stage stratified by ethnic and racial groups. The red line on Manhattan plot indicates genome-wide significance ( $p < 5 \times 10^{-8}$ ). The quantile-quantile (QQ) plot represents all observed p values ordered from largest to smallest against expected values from a chi-squared distribution. This plot can be used to detect systematic differences from expected due to the population stratification.

(EA: European Ancestry; HA: Hispanic American; AA: African American)
