# Supplementary material for: Genome-wide association identifies novel ROP risk loci in a multiethnic cohort
Source: PubMed Central journal article supplement (PMC10794688; doi:10.1038/s42003-023-05743-9), 2024-01-17
Supplement: 42003_2023_5743_MOESM5_ESM.pdf [file 42003_2023_5743_MOESM5_ESM.pdf]

## Reporting Summary

Nature Portfolio wishes to improve the reproducibility of the work that we publish. This form provides structure for consistency and transparency in reporting. For further information on Nature Portfolio policies, see our [Editorial Policies](#) and the [Editorial Policy Checklist](#).

### Statistics

For all statistical analyses, confirm that the following items are present in the figure legend, table legend, main text, or Methods section.

n/a Confirmed

- The exact sample size ( $n$ ) for each experimental group/condition, given as a discrete number and unit of measurement
- A statement on whether measurements were taken from distinct samples or whether the same sample was measured repeatedly
- The statistical test(s) used AND whether they are one- or two-sided  
*Only common tests should be described solely by name; describe more complex techniques in the Methods section.*
- A description of all covariates tested
- A description of any assumptions or corrections, such as tests of normality and adjustment for multiple comparisons
- A full description of the statistical parameters including central tendency (e.g. means) or other basic estimates (e.g. regression coefficient) AND variation (e.g. standard deviation) or associated estimates of uncertainty (e.g. confidence intervals)
- For null hypothesis testing, the test statistic (e.g.  $F$ ,  $t$ ,  $r$ ) with confidence intervals, effect sizes, degrees of freedom and  $P$  value noted  
*Give  $P$  values as exact values whenever suitable.*
- For Bayesian analysis, information on the choice of priors and Markov chain Monte Carlo settings
- For hierarchical and complex designs, identification of the appropriate level for tests and full reporting of outcomes
- Estimates of effect sizes (e.g. Cohen's  $d$ , Pearson's  $r$ ), indicating how they were calculated

*Our web collection on [statistics for biologists](#) contains articles on many of the points above.*

### Software and code

Policy information about [availability of computer code](#)

Data collection

N/A

Data analysis

Principal component analysis (PCA) was performed using SMARTPCA implemented in EIGENSOFT  
Imputation was conducted by Minimac using the Michigan Imputation Server  
GWAS analysis was performed using EPACTS software

For manuscripts utilizing custom algorithms or software that are central to the research but not yet described in published literature, software must be made available to editors and reviewers. We strongly encourage code deposition in a community repository (e.g. GitHub). See the Nature Portfolio [guidelines for submitting code & software](#) for further information.

### Data

Policy information about [availability of data](#)

All manuscripts must include a [data availability statement](#). This statement should provide the following information, where applicable:

- Accession codes, unique identifiers, or web links for publicly available datasets
- A description of any restrictions on data availability
- For clinical datasets or third party data, please ensure that the statement adheres to our [policy](#)

Data will be made available by request and in an NIH compliant fashion.

## Research involving human participants, their data, or biological material

Policy information about studies with [human participants or human data](#). See also policy information about [sex, gender \(identity/presentation\), and sexual orientation](#) and [race, ethnicity and racism](#).

|                                                                    |                                                                                                                                                                                                             |
|--------------------------------------------------------------------|-------------------------------------------------------------------------------------------------------------------------------------------------------------------------------------------------------------|
| Reporting on sex and gender                                        | Both male and female sex preterm infants were included in this study.                                                                                                                                       |
| Reporting on race, ethnicity, or other socially relevant groupings | Race and ethnicity were considered for all primary outcome measures and data are stratified by these factors throughout the work.                                                                           |
| Population characteristics                                         | All participants were preterm infants born with ROP risk. The primary outcome measure was ROP severity. The characteristics of our population are well published and reviewed in this work.                 |
| Recruitment                                                        | Participants were recruited as part of the iROP consortium with informed consent provided to the parent or legal guardian prior to enrollment, clinical data collection, and/or biologic sample collection. |
| Ethics oversight                                                   | This is a multicenter consortium; each center recruits under an approved single IRB protocol.                                                                                                               |

Note that full information on the approval of the study protocol must also be provided in the manuscript.

## Field-specific reporting

Please select the one below that is the best fit for your research. If you are not sure, read the appropriate sections before making your selection.

Life sciences       Behavioural & social sciences       Ecological, evolutionary & environmental sciences

For a reference copy of the document with all sections, see [nature.com/documents/nr-reporting-summary-flat.pdf](https://nature.com/documents/nr-reporting-summary-flat.pdf)

## Life sciences study design

All studies must disclose on these points even when the disclosure is negative.

|                 |                                                                                                                                                                                                                                 |
|-----------------|---------------------------------------------------------------------------------------------------------------------------------------------------------------------------------------------------------------------------------|
| Sample size     | 920 preterm infants were included in this analysis                                                                                                                                                                              |
| Data exclusions | We did not exclude data for any infant                                                                                                                                                                                          |
| Replication     | This is the first reported GWAS for ROP. We validated our findings using a multipronged approach including human tissue expression analysis and GWAS datasets for shared disease processes (ie pre-retinal neovascularization). |
| Randomization   | N/A                                                                                                                                                                                                                             |
| Blinding        | N/A                                                                                                                                                                                                                             |

## Reporting for specific materials, systems and methods

We require information from authors about some types of materials, experimental systems and methods used in many studies. Here, indicate whether each material, system or method listed is relevant to your study. If you are not sure if a list item applies to your research, read the appropriate section before selecting a response.

### Materials & experimental systems

|                                     |                                                        |
|-------------------------------------|--------------------------------------------------------|
| n/a                                 | Involved in the study                                  |
| <input checked="" type="checkbox"/> | <input type="checkbox"/> Antibodies                    |
| <input checked="" type="checkbox"/> | <input type="checkbox"/> Eukaryotic cell lines         |
| <input checked="" type="checkbox"/> | <input type="checkbox"/> Palaeontology and archaeology |
| <input checked="" type="checkbox"/> | <input type="checkbox"/> Animals and other organisms   |
| <input type="checkbox"/>            | <input checked="" type="checkbox"/> Clinical data      |
| <input checked="" type="checkbox"/> | <input type="checkbox"/> Dual use research of concern  |
| <input checked="" type="checkbox"/> | <input type="checkbox"/> Plants                        |

### Methods

|                                     |                                                 |
|-------------------------------------|-------------------------------------------------|
| n/a                                 | Involved in the study                           |
| <input checked="" type="checkbox"/> | <input type="checkbox"/> ChIP-seq               |
| <input checked="" type="checkbox"/> | <input type="checkbox"/> Flow cytometry         |
| <input checked="" type="checkbox"/> | <input type="checkbox"/> MRI-based neuroimaging |

## Clinical data

---

Policy information about [clinical studies](#)

All manuscripts should comply with the ICMJE [guidelines for publication of clinical research](#) and a completed [CONSORT checklist](#) must be included with all submissions.

|                             |                                                           |
|-----------------------------|-----------------------------------------------------------|
| Clinical trial registration | <input type="text" value="This is not a clinical trial"/> |
| Study protocol              | <input type="text" value="NA"/>                           |
| Data collection             | <input type="text" value="NA"/>                           |
| Outcomes                    | <input type="text" value="NA"/>                           |

## Plants

---

|                       |                                                         |
|-----------------------|---------------------------------------------------------|
| Seed stocks           | <input type="text" value="no plant material was used"/> |
| Novel plant genotypes | <input type="text" value="NA"/>                         |
| Authentication        | <input type="text" value="NA"/>                         |
